# Supplementary figures and images for: An intrabody specific for the nucleophosmin carboxy-terminal mutant and fused to a nuclear localization sequence binds its antigen but fails to relocate it in the nucleus
Source: PubMed Central journal article supplement — Biotechnol Rep (Amst). 2014 May 27;3:27–33. doi: 10.1016/j.btre.2014.05.008 (PMC5466097; doi:10.1016/j.btre.2014.05.008), 2014-05-27

# Supplementary Figure 1

|       |       |       |       |       |       |       |       |       |       |       |        |
|-------|-------|-------|-------|-------|-------|-------|-------|-------|-------|-------|--------|
| 0.179 | 0.249 | 0.246 | 0.421 | 0.417 | 0.352 | 0.252 | 0.314 | 0.429 | 0.490 | 0.448 | 0.320  |
| 0.120 | 0.467 | 0.490 | 0.291 | 0.504 | 0.341 | 0.394 | 0.631 | 0.279 | 0.414 | 0.329 | 0.329  |
| 0.141 | 0.190 | 0.227 | 0.245 | 0.425 | 0.259 | 0.430 | 0.471 | 0.484 | 0.456 | 0.449 | 0.290  |
| 0.100 | 0.292 | 0.290 | 0.668 | 0.365 | 0.342 | 0.301 | 0.456 | 0.366 | 0.378 | 0.454 | 0.326  |
| 0.161 | 0.095 | 0.353 | 0.499 | 0.254 | 0.131 | 0.339 | 0.348 | 0.381 | 0.205 | 0.349 | 0.366  |
| 0.101 | 0.318 | 0.329 | 0.342 | 0.301 | 0.338 | 0.369 | 0.387 | 0.472 | 0.401 | 0.328 | 0.344  |
| 0.079 | 0.364 | 0.283 | 0.349 | 0.310 | 0.348 | 0.323 | 0.321 | 0.365 | 0.310 | 0.329 | -0.025 |
| 0.226 | 0.210 | 0.278 | 0.284 | 0.334 | 0.404 | 0.300 | 0.461 | 0.471 | 0.350 | 0.311 | 0.000  |

|        |        |        |        |        |        |        |        |        |        |        |        |
|--------|--------|--------|--------|--------|--------|--------|--------|--------|--------|--------|--------|
| -0.047 | -0.040 | -0.040 | -0.036 | -0.035 | -0.047 | -0.038 | 0.100  | -0.029 | -0.029 | -0.029 | -0.033 |
| -0.045 | -0.039 | -0.039 | -0.044 | -0.028 | -0.036 | -0.042 | -0.035 | -0.034 | -0.034 | -0.034 | -0.040 |
| -0.035 | -0.036 | 0.013  | -0.041 | -0.035 | -0.036 | -0.028 | -0.011 | -0.032 | -0.035 | -0.032 | -0.029 |
| -0.041 | -0.039 | -0.026 | -0.022 | -0.032 | -0.018 | -0.032 | -0.020 | -0.035 | -0.032 | -0.032 | -0.033 |
| -0.034 | 0.018  | -0.026 | -0.031 | -0.029 | 0.013  | -0.030 | 0.145  | -0.029 | 0.031  | -0.012 | -0.022 |
| -0.033 | -0.030 | -0.029 | -0.025 | -0.018 | -0.020 | -0.013 | -0.014 | -0.022 | -0.008 | -0.017 | -0.014 |
| -0.045 | -0.022 | -0.033 | -0.036 | -0.036 | -0.034 | -0.032 | 0.090  | -0.030 | -0.028 | -0.017 | -0.037 |
| -0.023 | -0.014 | -0.015 | -0.018 | -0.015 | -0.011 | 0.065  | -0.014 | -0.013 | 0.087  | 0.003  | 0.000  |

A)

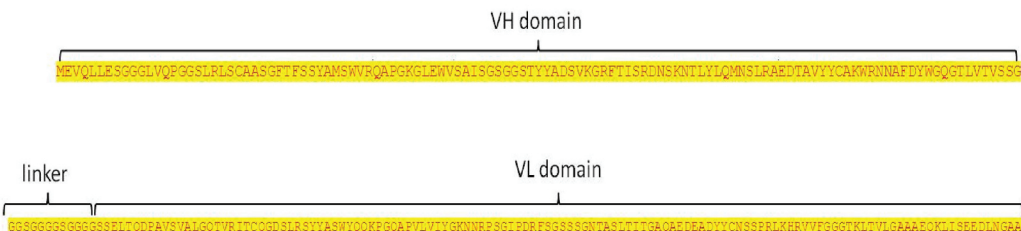

B)

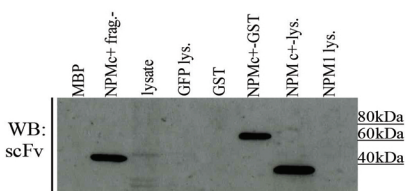

C)

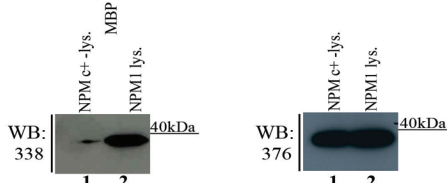

D)

Supplement: mmc1.pdf [file mmc1.pdf]
